# Supplementary material for: A novel method for diagnosing seasonal to inter-annual surface ocean carbon dynamics from bottle data using neural networks
Source: Copernicus journal article supplement (doi:10.5194/bg-10-4319-2013), 2013-06-27
Supplement: Supplementary file 1 [file bg-10-4319-2013-supplement.zip]

Archive with 4 entries (4 files):
- Supplementary material description.txt
- Supplementary_figures.pdf
- Supplementary_tables.docx
- Supplement material.pdf
