# Supplementary material for: A novel method for diagnosing seasonal to inter-annual surface ocean carbon dynamics from bottle data using neural networks
Source: Copernicus journal article supplement (doi:10.5194/bg-10-4319-2013), 2013-06-27
Supplement: Supplementary file 1 [file bg-10-4319-2013-supplement.zip › Supplementary_figures.pdf]

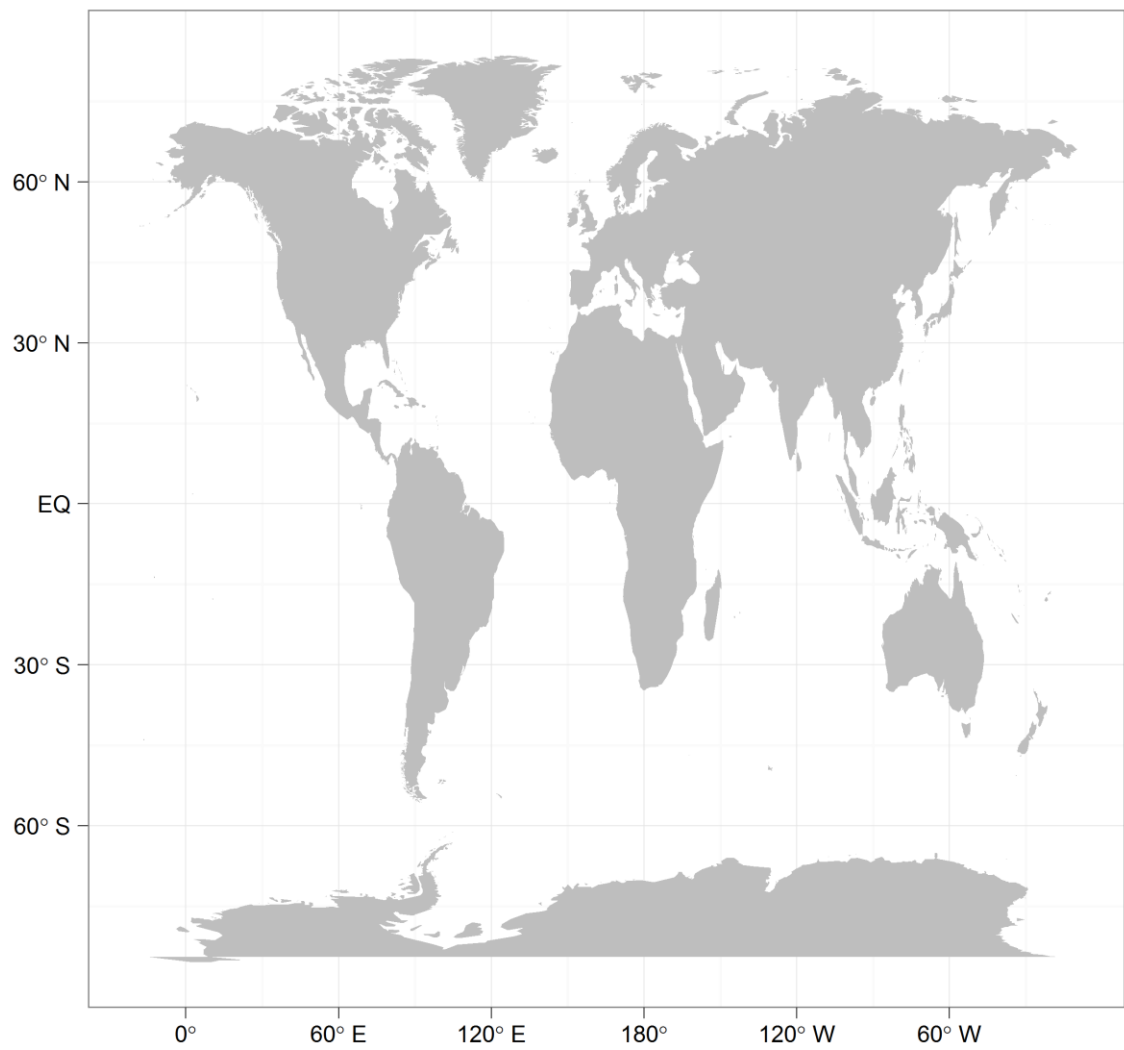

**Figure F1.** Global map after Longitude shift.

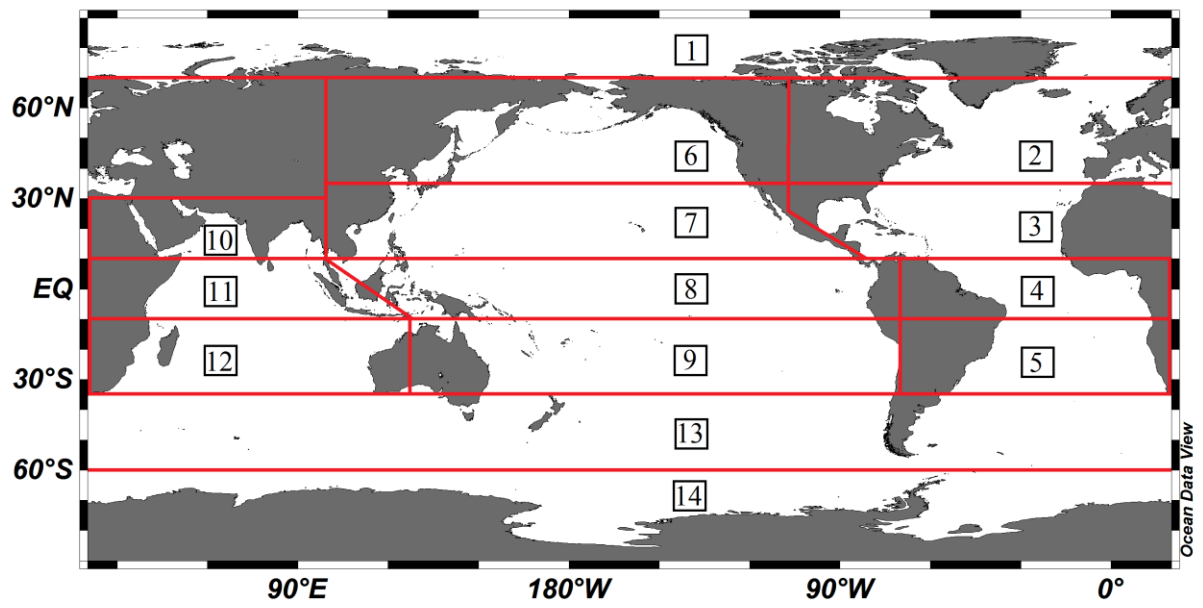

**Figure F2.** Geographical separation of independently predicted dataset into 14 regions.
